# Supplementary material for: Cancer Mortality Risks from Long-term Exposure to Ambient Fine Particle
Source: Oxford University Press journal article supplement (doi:10.1158/1055-9965.epi-15-0626), 2016-04-29
Supplement: 10559965epi150626-sup-151113_3_supp_3357965_p2kk9l.doc [file 10559965epi150626-sup-151113_3_supp_3357965_p2kk9l.doc]

**Supplementary Table S1.** Exposure estimation model and validation with deterministic model

| **Model** | **Coefficients (p-value)** |
| --- | --- |
| (constant) | 10.175 (0.154) |
| Inverse height | 102.701 (<0.001) |
| SEC | 115.068 (0.005) |
| R2 | 0.466 |
|  |  |
| **Validation measures** |  |
| mean absolute difference | 1.65 μg/m3 |
| root-mean-square error | 1.95 μg/m3 |
